# Supplementary material for: Evaluating the East African Point-of-Care Ultrasound (E-POCUS) Training Program Pilot: Lessons Learned and Best Practices
Source: Research Square preprint supplement (doi:10.21203/rs.3.rs-8621713/v1), 2026-02-11
Supplement: Supplementary file 1 [file 3643b015ff8612ba974d7c1e.docx]

E-POCUS Fellowship

# Table of Contents

[**Table of Contents 2**](#_heading=h.orh1ledm1svr)

[**Welcome Letter 3**](#_heading=h.cwqxojakmreg)

[**Fellowship Requirements 4**](#_heading=h.7cppwsd7cx0n)

[**Structure 5**](#_heading=h.y86ahs4rq1g)

[**2024 Revised Timeline 6**](#_heading=h.q7cskk6zxnqq)

[Preparation: January 2024 6](#_heading=h.y9dze2ao2jka)

[IPSIM 1: February 2024 6](#_heading=h.bojfarmrr804)

[Preliminary Topic List 6](#_heading=h.c2e04a8820z4)

[Off-Site Training: March 2024 – April 2024 7](#_heading=h.hwkdbey0ec9p)

[IPSIM 2: May 2024 7](#_heading=h.785vg2qeatgi)

[POCUS1 Teaching Requirements: 7](#_heading=h.jrq4j68v0liv)

[Preliminary Topic List 7](#_heading=h.kcaj5yarxc9p)

[Off-Site Training: June-August 2024 8](#_heading=h.n6dzs666dbd7)

[IPSIM 3: November 2024 8](#_heading=h.dim5w9vwp11s)

[Preliminary Topic List 8](#_heading=h.8cwgxk2vfmo0)

[Off-Site Training: December 2024 - Jan 2025 8](#_heading=h.licmmad7kpe9)

[IPSIM 4: February 2025 9](#_heading=h.2v0varf5mxql)

[Preliminary Topic List 9](#_heading=h.e7aek98tpltl)

[Off-Site Training/Wrap Up: February 2025 9](#_heading=h.iw3kwj61uuqz)

[**Appendix 1: Topic List 10**](#_heading=h.rldzrfx80uz4)

# Welcome Letter

Welcome to the E-POCUS Fellowship Program!

Congratulations on starting this comprehensive and dynamic 12-month journey dedicated to advancing your expertise in point-of-care ultrasound (POCUS). You are about to embark on an intensive and rewarding experience that will not only deepen your understanding of ultrasound but also equip you with the skills and knowledge needed to excel in emergency medicine practice.

Throughout this fellowship, you will engage in a structured curriculum comprising In-Person Scanning Intensive Months (IPSIMs) and off-site training periods. These carefully designed modules will immerse you in supervised and independent scanning sessions, quality assurance reviews, journal clubs, and academic sessions, all aimed at honing your proficiency in ultrasound across diverse medical disciplines.

The fellowship requirements are rigorous, encompassing scanning milestones, exam performance, teaching responsibilities, academic project undertakings, and active participation in curriculum development. Our goal is to ensure that you emerge from this program as adept and confident practitioners, capable of employing POCUS effectively in clinical settings.

As you navigate this fellowship, remember that you are part of a community committed to your success. Collaborate with your co-fellows, engage with our expert faculty, and take advantage of the resources and mentorship available to you. This fellowship is not only about individual growth but also about collectively contributing to the advancement of ultrasound education and practice.

We encourage you to embrace every opportunity presented, dive into each module with enthusiasm, and take ownership of your learning. Your dedication and effort will not only shape your personal development but also contribute to the ongoing evolution of this fellowship for future cohorts.

Once again, welcome to the E-POCUS Fellowship Program. We are thrilled to have you join us on this transformative journey, and we look forward to witnessing your growth and accomplishments over the coming year.

Regards,


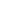


Indy S. Sahota MD MSc

E-POCUS Fellowship Director, TAAAC-EM

#

# Fellowship Requirements

**Scanning**

- **Supervised bedside scanning** totaling a minimum of 100 hours
- **Independent scanning** totaling 300 logged scans

**Exams**

- Pass all examinations with score of >80%

**Teaching**

- E-POCUS Fellows will teach/supervise residents for their core POCUS1 ultrasound training, supervising and signing off on at least 10 resident scans for the core indications.

**Academic Day Sessions**

- **Image Review**: E-POCUS Fellow-performed scans will be reviewed for quality assurance weekly during in-person scanning months and monthly during the virtual/off-site months of the fellowship. Minimum attendance of 80% is required. All Fellows are expected to have POCUS ready for presentation and review at each Image Review session.
- **Journal Clubs**: E-POCUS Fellows will present at journal clubs held weekly during in-person scanning months and monthly otherwise. All Fellows will be expected to attend with a minimum attendance of 80%. All Fellows will be expected to present and lead a minimum of 4 journal club discussions

**Academic Project**

- E-POCUS Fellows will undertake an academic project during the fellowship. This can include but is not limited to: case report, academic presentation, conference abstract, protocol design for a departmental QI initiative, focused case series, narrative review with emphasis on East African publications or other academic output.

**Curriculum Administration & Development**

- With ongoing support from E-POCUS staff, E-POCUS Fellows will collaborate to revise and update the curriculum with the goal of maintaining a sustainable E-POCUS fellowship run independently by all or some of the current fellows. This may include updating curriculum, reviewing areas of focus, planning for local accreditation, ultrasound logistics and maintenance.

#

# Structure

The 12-month fellowship will comprise 4 months of In-Person Scanning Intensive Months (IPSIMs) and 8 months of off-site training.

In-Person Scanning Intensive Months (IPSIMs)

There will be 4 IPSIMs (In-Person Scanning Intensive Months) through the 12-month fellowship, aligned with TAAAC-EM teaching trips where possible.

During the IPSIMs:

- Fellows to complete pre-quizzes/flipped classroom study material prior to each week of teaching.
- Supervised scanning: E-POCUS Fellows will participate in **one supervised full-day scanning shift per week** following the topics outlined below, supervised by the visiting POCUS expert
- Independent scanning: E-POCUS Fellows will participate in a minimum of **one independent scanning shift per week.**
- Quality assurance review: E-POCUS Fellow-performed scans will be reviewed by POCUS experts for **quality assurance** weekly.
- Journal clubs: E-POCUS Fellows will participate in weekly journal clubs during IPSIMs during which they will be expected to contribute to the overall discussions. Fellows will be assigned to present at certain journal club sessions.

Off-Site Training Months:

The off-site training months will be a total of 8 months throughout the fellowship.

During the Off-Site Training months:

- Fellows will be responsible for continuing their scanning, and consolidating the knowledge and skills attained during the preceding IPSIM.
- Scans performed in this time will be saved and reviewed at monthly Academic Sessions held virtually with POCUS Experts in Toronto. During these sessions a quality assurance review will be held, reviewing these scans and providing expert feedback on image acquisition and interpretation.
- Journal club sessions will also be held during these Academic Sessions where Fellows will be assigned presentations and be expected to lead and contribute to discussion around new or seminal ultrasound research papers.
- Fellows will work towards fulfilling their Academic Project requirements.

# 2024 Revised Timeline

## Preparation: January 2024

- Overview
  - Review fellowship requirements and orientation manual
  - Review of academic output requirements
  - Be aware of mandatory nature of journal clubs, virtual meetings and QA
- Review of POCUS1 materials
- Review of EDE textbook
- Complete Image SIM:
  - Cardiac
  - Lung
  - Soft Tissue
  - First Trimester Pregnancy TA
  - Intussusception (optional/elective)

## IPSIM 1: February 2024

### Preliminary Topic List

| **Week 1**   - Intro: How to submit images for QA, Butterfly Image archiving orientation and knobology, Philips Image archiving orientation and knobology, Sonoclip share - Cardiac 1: TTE views, qualitative & quantitative LV function (EPSS, Fractional Shortening) |
| --- |
| **Week 2**   - Lung 1: PTX, pleural effusions - Lung 2: Pneumonia, pulmonary edema |
| **Week 3**   - Abdo 1: Anatomy Review, FAST, Hepatosplenomegaly - Abdo 2: GB (Stones, Cholecystitis) - Abdo 3: Renal (Hydronephrosis, Stones) and Bladder (Size, Clots, Foley placement) |

| **Longitudinal**   - Procedural 1: Peripheral and central access - Procedural 2: Thoracentesis & Paracentesis - Procedural 3: Lumbar Puncture - Procedural 4: Pericardiocentesis - Procedural 5: ETT confirmation |
| --- |

## Off-Site Training: March 2024 – April 2024

- Monthly academic virtual session (~2-3 hours per month)
  - Journal club presentations
  - QA review
- Tele-mentorship sessions as needed to discuss academic work/curriculum questions.

## IPSIM 2: May 2024

### POCUS1 Teaching Requirements:

- In addition to the usual IPSIM requirements, Fellows will be required to demonstrate their POCUS teaching/curriculum implementation ability during the POCUS1 sessions.
- To fulfill the Teaching requirements of the Fellowship:
  - Fellows will be responsible for leading the POCUS1 education sessions in May 2024, and
  - Fellows will demonstrate teaching ability by supervising and signing off on a minimum of 10 resident scans.

### Preliminary Topic List

| Week 1   - Cardiac 2: Right Heart, PE - Cardiac 3: Valves, Cardiac Output |
| --- |
| Week 2   - Cardiac 4: RUSH - Cardiac 5: Diastology, Wall Motion Abnormality |
| Week 3   - Vascular 1: Lower Extremity DVT - Vascular 2: IVC, JVP, Carotid, Fluid Responsiveness |
| Week 4   - Nerve I: Intro to nerve blocks, upper extremity blocks - Nerve II: Plane blocks, Lower extremity blocks |

| Longitudinal   - Procedural 1: Peripheral and central access - Procedural 2: Thoracentesis & Paracentesis - Procedural 3: Lumbar Puncture - Procedural 4: Pericardiocentesis - Procedural 5: ETT confirmation |
| --- |

## Off-Site Training: June-August 2024

- Monthly academic virtual session (~2-3 hours)
  - Journal club presentations
  - QA review
- Tele-mentorship sessions as needed to discuss academic work/curriculum questions.
- Work towards Academic Project requirements

## IPSIM 3: November 2024

### Preliminary Topic List

| Week 1   - MSK 1: Joint Effusions, Fractures - MSK 2: Tendon rupture, Tendinopathies |
| --- |
| Week 2   - Ocular I: Vision Loss, RD, PVD, Vitreous Hemorrhage - Ocular II: ICP, Ocular Trauma |
| Week 3   - Cardiac 6: CURLS Protocol, Rheumatic Heart Disease - Cardiac 7: Focused Echo in stroke |
| Week 4   - Peds 1: Intussusception, Appendicitis - GU 1: Testicular Torsion, Hernias |

| Longitudinal   - Procedural 1: Peripheral and central access - Procedural 2: Thoracentesis & Paracentesis - Procedural 3: Lumbar Puncture - Procedural 4: Pericardiocentesis - Procedural 5: ETT confirmation |
| --- |

## Off-Site Training: December 2024 - Jan 2025

- Monthly academic virtual session (~2-3 hours)
  - Journal club presentations
  - QA review
- Tele-mentorship sessions as needed to discuss academic work/curriculum questions.
- Work towards Academic Project requirements

##

## IPSIM 4: February 2025

### Preliminary Topic List

| Week 1   - OBGYN 1: 1st TM bleeding - OBGYN 2: Fetal assessments |
| --- |
| Week 2   - Abdo 4: SBO, diverticulitis - Abdo 5: FASH-Plus Protocol |
| Week 3   - Tropical I: Echinococcus, Fasciola, Tropical ID POCUS, FASE - MSK 3: Soft tissue, Abscesses, Foreign Bodies, Necrotizing Infections |
| Week 4   - REVIEW |

| Longitudinal   - Procedural 1: Peripheral and central access - Procedural 2: Thoracentesis & Paracentesis - Procedural 3: Lumbar Puncture - Procedural 4: Pericardiocentesis - Procedural 5: ETT confirmation |
| --- |

## Off-Site Training/Wrap Up: February 2025

- Monthly academic virtual session (~2-3 hours)
  - Journal club presentations
  - QA review
- Tele-mentorship sessions as needed to discuss academic work/curriculum questions.
- Fellows will consolidate all their scanning logs and ensure all fellowship deliverables are met.
- Fellows will meet with the E-POCUS Fellowship Director to ensure all ongoing fellowship requirements have been met, including:
  - Logged scans
  - Ultrasound scanning hours
  - Research project for publication/presentation
  - Examinations
  - JC presentations
  - QA/IR attendance
- Graduation and certification date Dec 2024 – Jan 2025.

#

# Appendix 1: Topic List

***IPSIM 1***

| Week 1   - Intro: How to submit images for QA, Butterfly Image archiving orientation and knobology, Philips Image archiving orientation and knobology, Sonoclip share - Cardiac 1: TTE views, qualitative & quantitative LV function (EPSS, Fractional Shortening) |
| --- |
| Week 2   - Lung 1: PTX, pleural effusions - Lung 2: Pneumonia, pulmonary edema |
| Week 3   - Abdo 1: Anatomy Review, FAST, Hepatosplenomegaly - Abdo 2: GB (Stones, Cholecystitis) - Abdo 3: Renal (Hydronephrosis, Stones) and Bladder (Size, Clots, Foley placement) |

***IPSIM 2***

| Week 1   - Cardiac 2: Right Heart, PE - Cardiac 3: Valves, Cardiac Output |
| --- |
| Week 2   - Cardiac 4: RUSH - Cardiac 5: Diastology, Wall Motion Abnormality |
| Week 3   - Vascular 1: Lower Extremity DVT - Vascular 2: IVC, JVP, Carotid, Fluid Responsiveness |
| Week 4   - Nerve 1: Intro to nerve blocks, upper extremity blocks - Nerve 2: Plane blocks, Lower extremity blocks |

***IPSIM 3***

| Week 1   - MSK 1: Joint Effusions, Fractures - MSK 2: Tendon rupture, Tendinopathies |
| --- |
| Week 2   - Ocular 1: Vision Loss, RD, PVD, Vitreous Hemorrhage - Ocular 2: ICP, Ocular Trauma |
| Week 3   - Cardiac 6: CURLS Protocol, Rheumatic Heart Disease - Cardiac 7: Focused Echo in stroke |
| Week 4   - Peds 1: Intussusception, Appendicitis - GU 1: Testicular Torsion, Hernias |

***IPSIM 4***

| Week 1   - OBGYN 1: 1st TM bleeding - OBGYN 2: Fetal assessments |
| --- |
| Week 2   - Abdo 4: SBO, diverticulitis - Abdo 5: FASH-Plus Protocol |
| Week 3   - Tropical 1: Echinococcus, Fasciola, Tropical ID POCUS, FASE - MSK 3: Soft tissue, Abscesses, Foreign Bodies, Necrotizing Infections |
| Week 4   - REVIEW |

***PROCEDURES***

| Longitudinal   - Procedural 1: Peripheral and central access - Procedural 2: Thoracentesis & Paracentesis - Procedural 3: Lumbar Puncture - Procedural 4: Pericardiocentesis - Procedural 5: ETT confirmation |
| --- |
