# Supplementary material for: Evaluating the East African Point-of-Care Ultrasound (E-POCUS) Training Program Pilot: Lessons Learned and Best Practices
Source: Research Square preprint supplement (doi:10.21203/rs.3.rs-8621713/v1), 2026-02-11
Supplement: Supplementary file 2 [file e343a1ddf63e2fe34833a453.docx]

Semi-Structured Interviews - E-POCUS Program Staff

1. Could you please state your name?
2. Could you share your current role (e.g. physician, what hospital)
3. Could you share your role in the E-POCUS fellowship program?
4. How long have you been involved in the Fellowship and in what capacity?
5. What were the strengths of the following components of the fellowship
   1. Didactic teaching
   2. Asynchronous review/ background reading
   3. In-person U/S scanning
   4. Quality assurance
   5. Journal club
   6. Curriculum/administration education and modules
   7. Academic output
   8. Other
6. Could you describe any opportunities for improvement within the following components?
   1. Didactic teaching
   2. Asynchronous review/ background reading
   3. In-person U/S scanning
   4. Quality assurance
   5. Journal club
   6. Curriculum/administration education and modules
   7. Academic output
   8. Other
7. What are your overall general impressions of the program?
8. During your time as program staff for the E-POCUS Fellowship, how have participants’ knowledge and skill levels changed throughout the fellowship?
9. How do you envision the E-POCUS Fellowship influencing patient care?
10. Would you consider participating in advanced POCUS education in Ethiopia moving forward?
    1. If yes, what would you say are the main reasons why?
    2. If not, what are your deterrents?
11. Is there anything else you would like to share?

Semi-Structured Interview Guide - E-POCUS Fellows

1. Could you please state your name?
2. What are your general impressions of the Fellowship now that you have finished?
3. I am going to share the different components that make up the E-POCUS Fellowship. Can you please expand specifically on the STRENGTHS and WEAKNESSED of the specific components. I will be asking about what could be done differently later.
   1. Asynchronous review/ background reading
   2. Didactic teaching
   3. In-person U/S scanning
   4. Quality assurance
   5. Journal club
   6. Curriculum/administration education and modules
   7. Academic output
   8. Other
4. I am going to share the same components, can you please expand specifically on the WEAKNESSES of the specific components.
   1. Asynchronous review/ background reading
   2. Didactic teaching
   3. Asynchronous review/ background reading
   4. In-person U/S scanning
   5. Quality assurance
   6. Journal club
   7. Curriculum/administration education and modules
   8. Academic output
   9. Other
5. Do you feel your ultrasound scanning skills have improved over the course of the fellowship? Why or why not?
6. How do you envision the E-POCUS Fellowship influencing patient care?
7. How do you see the E-POCUS Fellowship impacting your future role in the department? The department in general?
8. Do you think the E-POCUS fellowship can be integrated into current hospital/academic infrastructure?
9. Is there anything you wish you would have learned in the fellowship? Anything that you wish you didn't or that wasn’t useful?
10. Is there anything you would have changed? Or anything that made it difficult for you to participate in the fellowship?
11. Do you have any additional comments?

Semi-Structured Interview Guide - Former E-POCUS Fellows

1. Could you please state your name?
2. What was your general impression of the Fellowship when you first committed to participating in it?
3. Did you have any specific reasons you decided to no longer participate in the E-POCUS fellowship?
   1. Prompts:
      1. Individual reasons
      2. Fellowship design reasons
4. Recognizing you started, but did not continue with the fellowship, I am going to share the different components that make up the E-POCUS Fellowship. Can you please expand specifically on the STRENGTHS of the specific components. I will be asking about what could be done differently later.
   1. Asynchronous review/ background reading
   2. Didactic teaching
   3. In-person U/S scanning
   4. Quality assurance
   5. Journal club
   6. Curriculum/administration education and modules
   7. Academic output
   8. Other
5. I am going to share the same components, can you please expand specifically on the WEAKNESSES of the specific components.
   1. Asynchronous review/ background reading
   2. Didactic teaching
   3. Asynchronous review/ background reading
   4. In-person U/S scanning
   5. Quality assurance
   6. Journal club
   7. Curriculum/administration education and modules
   8. Academic output
   9. Other
6. While it was originally designed to have 4 months of in person teaching, it was modified to have in person teaching spread out over a year. Did you have a preference?
7. Do you think the E-POCUS fellowship can be integrated into current hospital/academic infrastructure?
   1. Does it matter if you are participating in an accredited fellowship?
8. Are you interested in pursuing future education around POCUS?
   1. If yes, what types of POCUS education would you be interested in?
   2. If not, why are you no longer interested in POCUS education?
9. Do you have any ideas of what should be included in a POCUS fellowship within Ethiopia?
10. Do you have any additional comments?
